# Supplementary material for: Edible Wild Vegetables Urtica dioica L. and Aegopodium podagraria L.–Antioxidants Affected by Processing
Source: MDPI journal article supplement (doi:10.3390/plants11202710), 2022-10-14
Supplement: s1 [file s1]

## Supplementary

**Table S1.** Concentrations of selected phenolic compounds and ascorbic acid derivatives [ $\mu\text{g}/\text{mg}$  sample] in *Urtica dioica* L. uncooked (0 min) and after 20 min of cooking. Significant differences within one compound were calculated by ANOVA and Tukey HSD ( $p \leq 0.05$ ). AsAD: ascorbic acid and its derivatives, CGA: coumaroylglucaric acid (isomer 1/isomer 2), diCQA: di-caffeoylquinic acid, CQA: 5-caffeoylquinic acid, CMA: caffeoylmalic acid.

|                         | AsAD <sup>1</sup>  | CGA <sup>1,2</sup> | CGA <sup>2,2</sup> | diCQA <sup>2</sup> | CQA <sup>2</sup>  | CMA <sup>2</sup>  | Total | AsAD <sup>*1</sup> | CGA <sup>1,2</sup> | CGA <sup>2,2</sup> | diCQA <sup>2</sup> | CQA <sup>2</sup>   | CMA <sup>2</sup>  | Total |
|-------------------------|--------------------|--------------------|--------------------|--------------------|-------------------|-------------------|-------|--------------------|--------------------|--------------------|--------------------|--------------------|-------------------|-------|
|                         | freeze-dried       |                    |                    |                    |                   |                   |       | oven-dried         |                    |                    |                    |                    |                   |       |
| fresh<br>0 min          | 5.53<br><i>a</i>   | 0.70<br><i>ab</i>  | 0.54<br><i>a</i>   | 0.63<br><i>abc</i> | 3.18<br><i>a</i>  | 0.69<br><i>ad</i> | 11.27 | 13.25<br><i>ab</i> | 0.55<br><i>a</i>   | 0.24<br><i>ab</i>  | 0.61<br><i>bcd</i> | 3.46<br><i>bcd</i> | 0.60<br><i>ac</i> | 18.71 |
| fresh<br>0 min + CQA    | 5.40<br><i>a</i>   | 0.50<br><i>ab</i>  | 0.18<br><i>a</i>   | 0.30<br><i>ab</i>  | 1.43<br><i>a</i>  | 0.57<br><i>ac</i> | 8.38  | 11.36<br><i>a</i>  | 0.41<br><i>a</i>   | 0.36<br><i>ab</i>  | 0.44<br><i>ac</i>  | 1.92<br><i>ab</i>  | 0.37<br><i>ab</i> | 14.86 |
| fresh<br>20 min         | 12.01<br><i>d</i>  | 2.38<br><i>c</i>   | 1.86<br><i>cd</i>  | 1.34<br><i>cd</i>  | 10.30<br><i>c</i> | 0.94<br><i>ad</i> | 28.83 | 16.08<br><i>ab</i> | 0.71<br><i>ab</i>  | 0.38<br><i>ab</i>  | 0.25<br><i>ab</i>  | 4.10<br><i>d</i>   | 0.54<br><i>ac</i> | 22.06 |
| fresh<br>20 min + CQA   | 8.19<br><i>ac</i>  | 3.53<br><i>d</i>   | 2.14<br><i>d</i>   | 1.80<br><i>d</i>   | 12.13<br><i>c</i> | 1.21<br><i>d</i>  | 29.00 | 15.89<br><i>ab</i> | 1.84<br><i>d</i>   | 0.92<br><i>c</i>   | 1.08<br><i>e</i>   | 4.20<br><i>d</i>   | 0.61<br><i>ac</i> | 24.54 |
| fridge<br>0 min         | 6.55<br><i>ac</i>  | 0.32<br><i>ab</i>  | 0.14<br><i>a</i>   | 0.07<br><i>a</i>   | 0.17<br><i>a</i>  | 0.39<br><i>ab</i> | 7.64  | 17.03<br><i>ab</i> | 0.18<br><i>a</i>   | 0.11<br><i>a</i>   | 0.11<br><i>a</i>   | 0.15<br><i>a</i>   | 0.35<br><i>a</i>  | 17.93 |
| fridge<br>0 min + CQA   | 7.41<br><i>ac</i>  | 0.21<br><i>a</i>   | 0.00<br><i>a</i>   | 0.13<br><i>a</i>   | 0.13<br><i>a</i>  | 0.35<br><i>a</i>  | 8.23  | 18.52<br><i>b</i>  | 0.34<br><i>a</i>   | 0.11<br><i>a</i>   | 0.11<br><i>a</i>   | 0.14<br><i>a</i>   | 0.42<br><i>ab</i> | 19.64 |
| fridge<br>20 min        | 9.21<br><i>cd</i>  | 1.19<br><i>b</i>   | 2.94<br><i>b</i>   | 0.51<br><i>abc</i> | 4.05<br><i>ab</i> | 0.77<br><i>ad</i> | 18.67 | 15.14<br><i>ab</i> | 0.99<br><i>ad</i>  | 0.24<br><i>ab</i>  | 0.21<br><i>a</i>   | 2.67<br><i>bcd</i> | 0.50<br><i>ac</i> | 19.75 |
| fridge<br>20 min + CQA  | 9.62<br><i>cd</i>  | 2.25<br><i>c</i>   | 1.30<br><i>bc</i>  | 1.04<br><i>bd</i>  | 8.92<br><i>bc</i> | 1.06<br><i>cd</i> | 24.19 | 17.15<br><i>ab</i> | 1.65<br><i>cd</i>  | 0.85<br><i>c</i>   | 0.76<br><i>ce</i>  | 3.80<br><i>cd</i>  | 0.83<br><i>c</i>  | 25.04 |
| freezer<br>0 min        | 5.67<br><i>ab</i>  | 0.61<br><i>ab</i>  | 0.12<br><i>a</i>   | 0.15<br><i>ab</i>  | 0.62<br><i>a</i>  | 0.56<br><i>ac</i> | 7.73  | 13.11<br><i>ab</i> | 0.63<br><i>ab</i>  | 0.36<br><i>ab</i>  | 0.49<br><i>acd</i> | 1.97<br><i>ac</i>  | 0.62<br><i>ac</i> | 17.18 |
| freezer<br>0 min + CQA  | 5.75<br><i>ab</i>  | 0.50<br><i>ab</i>  | 0.12<br><i>a</i>   | 0.20<br><i>ab</i>  | 0.97<br><i>a</i>  | 0.60<br><i>ad</i> | 8.14  | 14.21<br><i>ab</i> | 0.85<br><i>abc</i> | 0.25<br><i>ab</i>  | 0.78<br><i>de</i>  | 2.37<br><i>bcd</i> | 0.43<br><i>ab</i> | 18.89 |
| freezer<br>20 min       | 8.89<br><i>bcd</i> | 2.18<br><i>c</i>   | 1.80<br><i>cd</i>  | 1.31<br><i>cd</i>  | 9.30<br><i>c</i>  | 1.0<br><i>bcd</i> | 24.48 | 16.77<br><i>ab</i> | 0.91<br><i>abc</i> | 0.58<br><i>bc</i>  | 0.41<br><i>ab</i>  | 3.95<br><i>d</i>   | 0.72<br><i>bc</i> | 23.34 |
| freezer<br>20 min + CQA | 7.52<br><i>ac</i>  | 2.64<br><i>cd</i>  | 1.73<br><i>cd</i>  | 1.37<br><i>cd</i>  | 8.95<br><i>bc</i> | 1.04<br><i>cd</i> | 23.25 | 14.30<br><i>ab</i> | 1.50<br><i>bd</i>  | 0.62<br><i>bc</i>  | 0.76<br><i>ce</i>  | 3.18<br><i>bcd</i> | 0.61<br><i>ac</i> | 20.97 |

<sup>1</sup> calibration with ascorbic acid; <sup>2</sup> calibration with 5-caffeoylquinic acid; NA = no peaks were detected.

**Table S2.** Concentrations of selected phenolic compounds and ascorbic acid derivatives [ $\mu\text{g}/\text{mg}$  sample] in *Aegopodium podagraria* L. uncooked (0 min) and after 20 min of cooking. Significant differences within one compound were calculated by ANOVA and Tukey HSD ( $p \leq 0.05$ ). AsAD: ascorbic acid derivatives, 3-CQA: 3-caffeoylquinic acid, CQA: 5-caffeoylquinic acid, CQAdim: caffeoylquinic acid dimer, diCQA: di-caffeoylquinic acid, K3G: kaempferol-3-glucosid.

|                         | AsAD <sup>1</sup> | 3-CQA <sup>2</sup> | CQAdim <sup>2</sup> | 5-CQA <sup>2</sup> | diCQA <sup>2</sup> | K3G <sup>3</sup>   | Total | AsAD <sup>1</sup> | 3-CQA <sup>2</sup> | CQAdim <sup>2</sup> | 5-CQA <sup>2</sup> | diCQA <sup>2</sup> | K3G <sup>3</sup>  | Total |
|-------------------------|-------------------|--------------------|---------------------|--------------------|--------------------|--------------------|-------|-------------------|--------------------|---------------------|--------------------|--------------------|-------------------|-------|
|                         | freeze-dried      |                    |                     |                    |                    |                    |       | oven-dried        |                    |                     |                    |                    |                   |       |
| fresh<br>0 min          | 5.03<br><i>ac</i> | 0.16<br><i>a</i>   | 0.11<br><i>a</i>    | 0.79<br><i>a</i>   | 0.17<br><i>a</i>   | NA                 | 6.26  | 5.63<br><i>a</i>  | 0.33<br><i>a</i>   | 0.23<br><i>a</i>    | 7.21<br><i>ab</i>  | 4.03<br><i>b</i>   | NA                | 17.43 |
| fresh<br>0 min + CQA    | 4.23<br><i>ab</i> | 0.15<br><i>a</i>   | 0.11<br><i>a</i>    | 1.31<br><i>a</i>   | 0.18<br><i>a</i>   | NA                 | 5.98  | 5.62<br><i>a</i>  | 0.28<br><i>a</i>   | 0.35<br><i>a</i>    | 10.01<br><i>b</i>  | 3.6<br><i>b</i>    | NA                | 19.86 |
| fresh<br>20 min         | 5.31<br><i>ac</i> | 1.72<br><i>b</i>   | 2.60<br><i>b</i>    | 12.07<br><i>b</i>  | 5.35<br><i>b</i>   | 10.41<br><i>ab</i> | 37.46 | 6.06<br><i>a</i>  | 1.94<br><i>b</i>   | 2.29<br><i>b</i>    | 11.01<br><i>b</i>  | 3.59<br><i>b</i>   | 10.83<br><i>b</i> | 24.89 |
| fresh<br>20 min + CQA   | 4.58<br><i>ac</i> | 1.46<br><i>b</i>   | 2.49<br><i>b</i>    | 15.63<br><i>b</i>  | 5.61<br><i>b</i>   | 8.00<br><i>ab</i>  | 37.77 | 5.98<br><i>a</i>  | 2.23<br><i>b</i>   | 2.01<br><i>b</i>    | 9.32<br><i>b</i>   | 3.95<br><i>b</i>   | 5.74<br><i>ab</i> | 29.23 |
| fridge<br>0 min         | 4.85<br><i>ac</i> | 0.11<br><i>a</i>   | 0.10<br><i>a</i>    | 0.10<br><i>a</i>   | 0.11<br><i>a</i>   | NA                 | 5.27  | 5.59<br><i>a</i>  | 0.13<br><i>a</i>   | 0.11<br><i>a</i>    | 0.17<br><i>a</i>   | 0.15<br><i>a</i>   | NA                | 6.15  |
| fridge<br>0 min + CQA   | 5.94<br><i>ac</i> | 0.10<br><i>a</i>   | 0.10<br><i>a</i>    | 0.17<br><i>a</i>   | 0.17<br><i>a</i>   | NA                 | 6.48  | 5.85<br><i>a</i>  | 0.12<br><i>a</i>   | 0.10<br><i>a</i>    | 0.25<br><i>a</i>   | 0.2<br><i>a</i>    | NA                | 6.52  |
| fridge<br>20 min        | 7.22<br><i>c</i>  | 1.96<br><i>b</i>   | 3.12<br><i>b</i>    | 14.35<br><i>b</i>  | 5.5<br><i>b</i>    | 10.07<br><i>ab</i> | 42.22 | 6.42<br><i>a</i>  | 1.93<br><i>b</i>   | 2.37<br><i>b</i>    | 9.24<br><i>b</i>   | 3.42<br><i>b</i>   | 6.22<br><i>ab</i> | 29.60 |
| fridge<br>20 min + CQA  | 7.77<br><i>c</i>  | 2.03<br><i>b</i>   | 3.04<br><i>b</i>    | 18.89<br><i>b</i>  | 7.51<br><i>b</i>   | 10.07<br><i>ab</i> | 49.31 | 6.37<br><i>a</i>  | 2.54<br><i>b</i>   | 2.39<br><i>b</i>    | 11.22<br><i>b</i>  | 4.07<br><i>b</i>   | 6.23<br><i>ab</i> | 32.82 |
| freezer<br>0 min        | 3.93<br><i>ab</i> | 0.17<br><i>a</i>   | 0.11<br><i>a</i>    | 0.83<br><i>a</i>   | 0.16<br><i>a</i>   | NA                 | 5.20  | 5.47<br><i>a</i>  | 0.34<br><i>a</i>   | 0.28<br><i>a</i>    | 6.96<br><i>ab</i>  | 3.48<br><i>b</i>   | NA                | 16.53 |
| freezer<br>0 min + CQA  | 3.42<br><i>a</i>  | 0.13<br><i>a</i>   | 0.11<br><i>a</i>    | 0.95<br><i>a</i>   | 0.14<br><i>a</i>   | NA                 | 4.75  | 5.30<br><i>a</i>  | 0.26<br><i>a</i>   | 0.25<br><i>a</i>    | 7.69<br><i>ab</i>  | 1.71<br><i>ab</i>  | NA                | 15.21 |
| freezer<br>20 min       | 6.82<br><i>bc</i> | 2.34<br><i>b</i>   | 3.57<br><i>b</i>    | 19.82<br><i>b</i>  | 6.78<br><i>b</i>   | 13.23<br><i>b</i>  | 52.56 | 6.00<br><i>a</i>  | 2.37<br><i>b</i>   | 2.23<br><i>b</i>    | 9.69<br><i>b</i>   | 3.56<br><i>b</i>   | 6.94<br><i>ab</i> | 30.79 |
| freezer<br>20 min + CQA | 4.29<br><i>ac</i> | 1.72<br><i>b</i>   | 1.96<br><i>b</i>    | 14.00<br><i>b</i>  | 5.62<br><i>b</i>   | 2.05<br><i>a</i>   | 29.64 | 5.93<br><i>a</i>  | 1.97<br><i>b</i>   | 1.90<br><i>b</i>    | 7.61<br><i>ab</i>  | 2.92<br><i>ab</i>  | 5.55<br><i>a</i>  | 25.88 |

<sup>1</sup> calibration with ascorbic acid; <sup>2</sup> calibration with 5-caffeoylquinic acid; <sup>3</sup> calibration with quercetin-3-rutinosid; NA = no peaks were detected.

**Table S3.** Mass spectra, retention times, and absorbance maxima of phenolic compounds and ascorbic acid derivatives tentatively identified in *Urtica dioica* L., by HPLC-QQQ and HPLC-DAD.

| MS  |                    | MS <sup>2</sup>        | Ret. time<br>(Fig. 1) | $\lambda_{\text{max}}$ (nm) | Peak no.<br>(Fig. 1) | Compound                      | Reference      |
|-----|--------------------|------------------------|-----------------------|-----------------------------|----------------------|-------------------------------|----------------|
| MW  | [M-H] <sup>-</sup> | [M-H] <sup>-</sup>     |                       |                             |                      |                               |                |
| 176 | 175                | **                     | 2.9; 3.3; 3.6         | 210, 245                    | 1-3                  | ascorbic acid derivates       | standard       |
| 316 | 315                | 153, 109               |                       |                             | *                    | protocatechuic acid glucoside | [58]           |
| 356 | 355                | 209, 191, 85           |                       |                             | 4                    | coumaroylglucaric acid isomer |                |
| 356 | 355                | 209, 191, 85           | 6.6                   | 323, 222, 410, 471          | 5                    | coumaroylglucaric acid isomer |                |
| 516 | 515                | 353, 191               | 13.5                  | 221, 324, 471               | 6                    | di-caffeoylquinic acid        | [58]           |
| 254 | 353                | 191, 179, 173, 135, ** | 14.6                  | 221, 324, 409               | 7                    | 5-caffeoylquinic acid         | standard       |
| 296 | 295                | 151, 133               | 16.4                  | 210, 324, 243               | 8                    | caffeoylmalic acid            | [28,59]        |
| 592 | 591                | 295, 133               | 21.3                  | 313, 223, 410, 471          | *                    | caffeoylmalate                | [28]           |
| 164 | 163                | 119                    |                       |                             | *                    | <i>p</i> -coumaric acid       | [58,28,60]     |
| 194 | 193                | 179, 149, 135, 119     |                       |                             | *                    | ferulic acid                  | [28,60]        |
| 610 | 609                | 301, **                |                       |                             | *                    | quercetin-3-rutinoside        | standard, [28] |
| 744 | 743                | 209, 371               |                       |                             | *                    | caffeoylglucaric acid (dimer) | [61]           |
| 310 | 309                | 291, 171               |                       |                             | *                    | feruloyl malate               | [28]           |

\* Peaks were tentatively identified in the MS-experiment only and were not part of the quantitative analysis by HPLC-DAD. \*\* Identified only by spiking the sample with standards.

**Table S4.** Mass spectra, retention times, and absorbance maxima of phenolic compounds and ascorbic acid derivatives tentatively identified in *Aegopodium podagraria* L., by HPLC-QQQ and HPLC-DAD.

| MS  |                    | MS <sup>2</sup>    | Ret. time     | $\lambda_{\text{max}}$ (nm) | Peak no.<br>(Fig. 2) | Compound                            | Reference        |
|-----|--------------------|--------------------|---------------|-----------------------------|----------------------|-------------------------------------|------------------|
| MW  | [M-H] <sup>-</sup> | [M-H] <sup>-</sup> |               |                             |                      |                                     |                  |
| 176 | 175                | **                 | 2.9; 3.3; 3.6 | 210, 245                    | 1-3                  | ascorbic acid derivatives           | standard         |
| 354 | 353                | 191, 179, 135, **  | 14.6          | 210, 324, 243               | 6                    | 5-caffeoylquinic acid               | standard, [2]    |
| 354 | 353                | 191, 179, 135, **  | 6.7           | 324, 221, 523, 471          | 4                    | 3-caffeoylquinic acid               | standard, [2,58] |
| 354 | 353                | 191, 179, 135, **  |               |                             | *                    | 4-caffeoylquinic acid               | standard, [2]    |
| 338 | 337                | 191                |               |                             | *                    | coumaroylquinic acid                | [2,30]           |
| 706 | 705                | 513, 339           |               |                             | *                    | caffeoylquinic acid dehydro (dimer) | [2,61]           |
| 516 | 515                | 353, 191, 179, 155 | 31.5          | 325, 243, 224               | 7                    | di-caffeoylquinic acid              | [2,58]           |
| 708 | 707                | 353, 191           | 12.8          | 325, 222, 241, 524          | 5                    | caffeoylquinic acid (dimer)         | [61]             |
| 506 | 505                | 301                |               |                             | *                    | quercetin-3-acetyl-glucoside        | [61]             |
| 494 | 493                | 447, 101           | 34.7          | 327, 243, 223, 471          | 8                    | kaempferol-3-glucoside              | [2]              |

\* Peaks were tentatively identified in the MS-experiment only and were not part of the quantitative analysis by HPLC-DAD. \*\* Identified only by spiking the sample with standards.

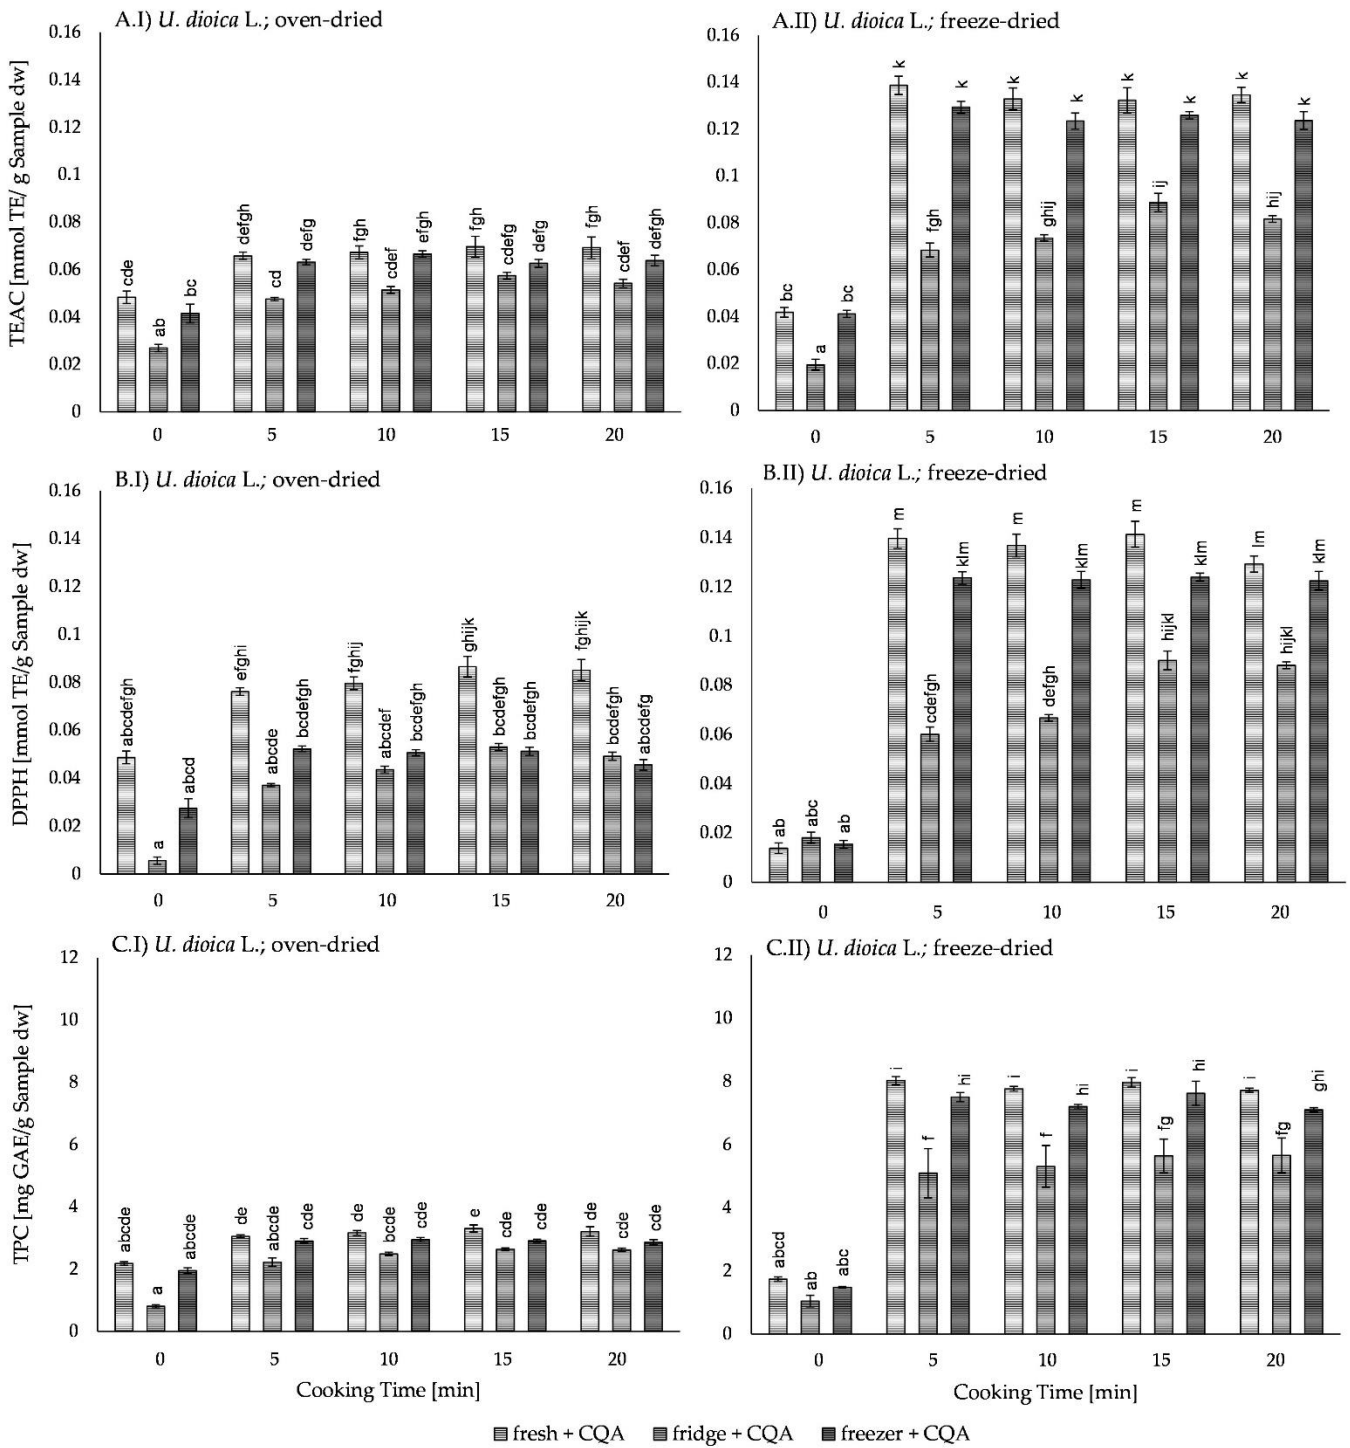

**Figure S1.** Antioxidant activity of (I) oven-dried and (II) freeze dried uncooked (0 min) and cooked (5, 10, 15, and 20 min) from *Urtica dioica* L. samples with added 5-caffeoylquinic acid (CQA) measured by (A) TEAC-, (B) DPPH- and (C) TPC assay. Fresh samples (light grey), samples stored after cooking in the fridge (7°C for 3 days; medium grey) and samples stored in the freezer (-20°C for 30 days; dark grey) were compared. Bars represent mean  $\pm$  standard error (SE). Significant differences ( $p \leq 0.05$  by Tukey's HSD test) marked with lower case letters.

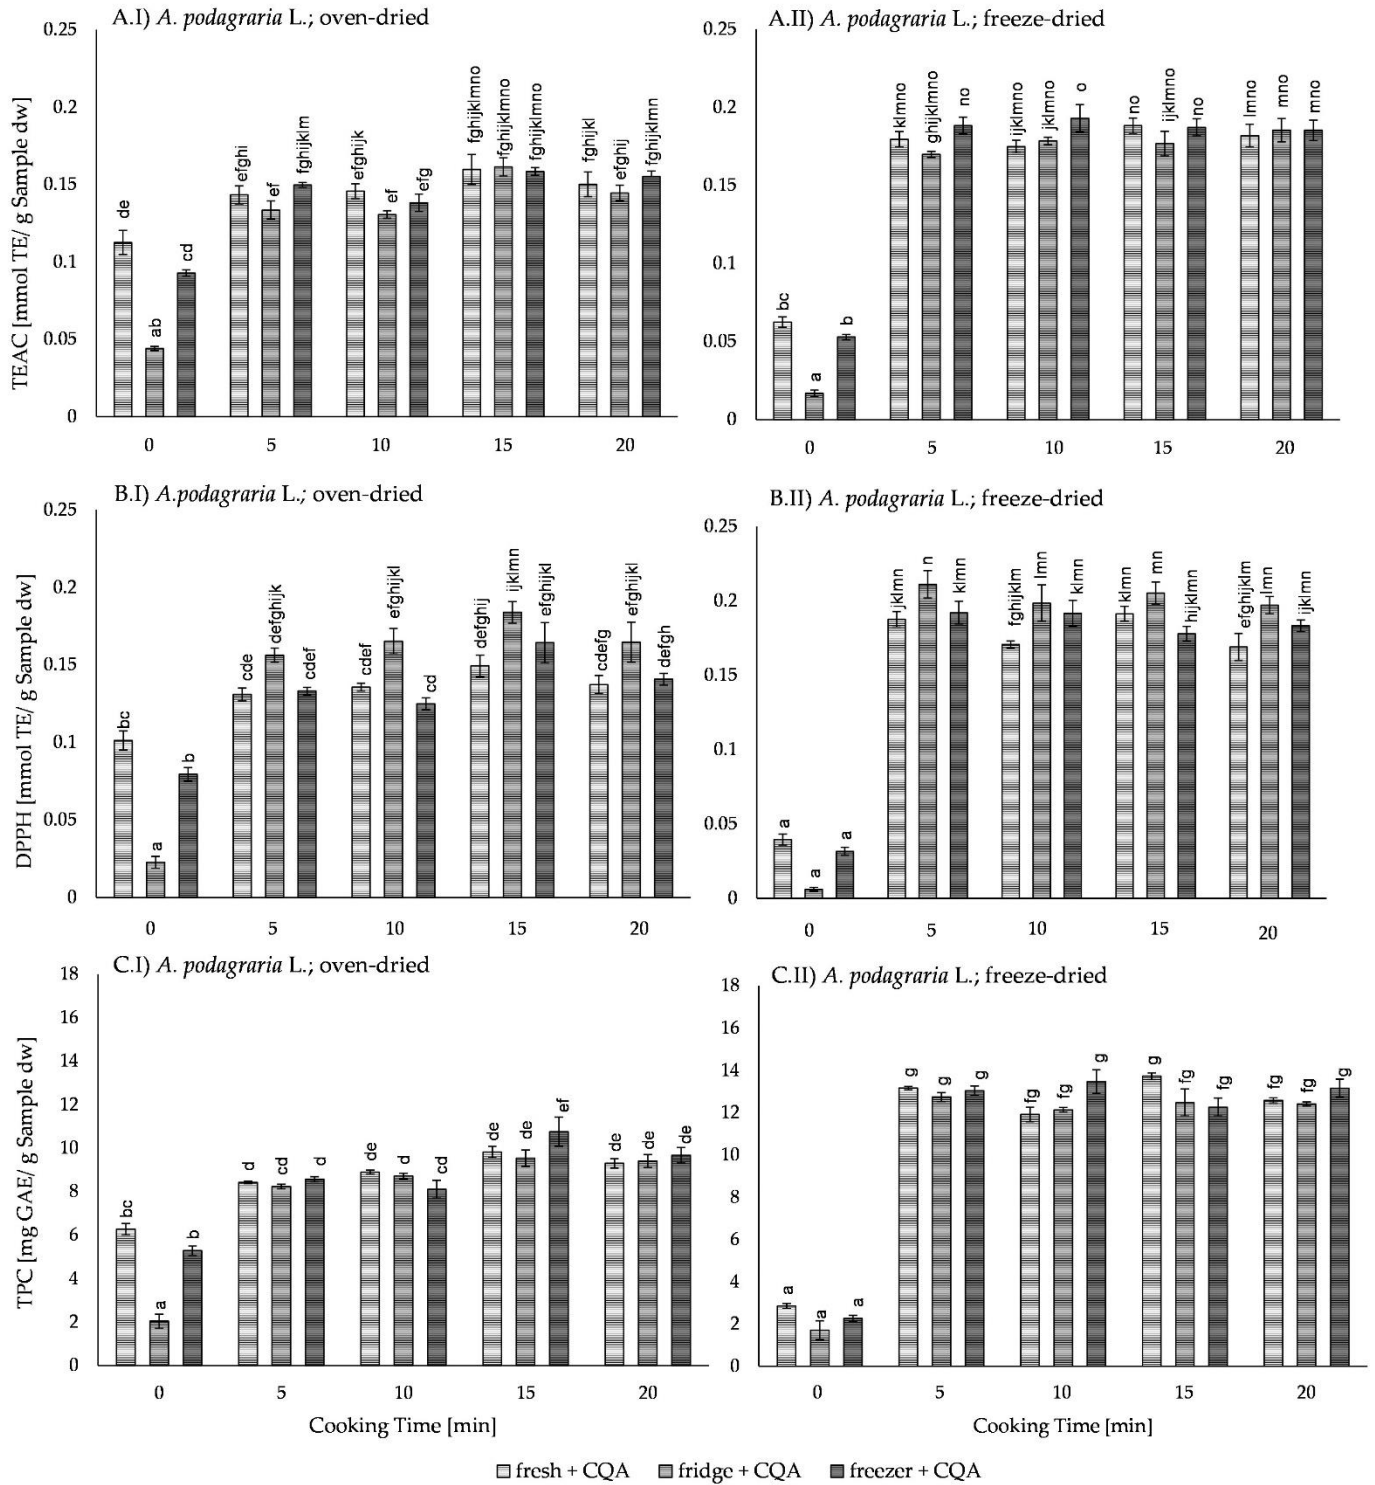

**Figure S2.** Antioxidant activity of (I) oven-dried and (II) freeze dried uncooked (0 min) and cooked (5, 10, 15, and 20 min) from *Aegopodium podagraria* L. samples with added 5-caffeoylquinic acid (CQA) measured by (A) TEAC-, (B) DPPH- and (C) TPC assay. Fresh samples (light grey), samples stored after cooking in the fridge (7°C for 3 days; medium grey) and samples stored in the freezer (-20°C for 30 days; dark grey) were compared. Bars represent mean  $\pm$  standard error (SE). Significant differences ( $p \leq 0.05$  by Tukey's HSD test) marked with lower case letters.
